# Supplementary material
Source: PubMed Central journal article supplement (PMC3374493)
Supplement: NIHMS381596-supplement-supplement_1.pdf [file NIHMS381596-supplement-supplement_1.pdf]

# Supplementary Information

## MATERIALS AND METHODS

### Cell culture

T6PN cell cultures<sup>1</sup> were infected with retrovirus expressing hTERT.<sup>2</sup> After 3 passages, the cell culture was further infected with VSV-G pseudotyped retrovirus expressing E47 as a fusion protein with the modified estrogen receptor (E47mer; kind gift from Kees Murre).<sup>3</sup> The vector also contained the CD25 cell surface marker, permitting the use of fluorescence-activated cell sorting (FACS) to sort infected cells. The cell line expressing telomerase and E47 was termed T6PNE. It was maintained in Dulbecco's modified Eagle's medium (DMEM) and 5.5 mM glucose supplemented with 10% fetal bovine serum (FBS). To induce E47 activity in cells under experimental conditions, we added tamoxifen (0.5-10  $\mu$ M) to the culture media. BrdU incorporation studies were performed with BrdU (GE, Piscataway, NJ) added to cells for up to 2 h. For structure-activity relationship (SAR) studies, compounds were added to cells for 48 h. For chronic ethopropazine treatment, T6PNE cells were seeded in 0.5  $\mu$ M tamoxifen. At 24 h, either 15  $\mu$ M ethopropazine or a vehicle control was added. At 96 h, the cells were passed into either a 384-well clear-bottom black well plate for imaging or to a culture dish with fresh ethopropazine or vehicle. The same passing procedure was performed every 3 days for the remainder of the 12-day experiment ( $n = 3$ ; experiment was performed 3 times; error bars are standard error;  $p < 0.05$ ). HeLa cells were maintained in DMEM (GIBCO, Carlsbad, CA) and 10% FBS. Human islets were obtained from the NIH/JDRF Islet Cell Resource Center Program.

**Vector design and transfection studies.** HeLa cells (ATCC, Manassas, VA) were transfected by the CaPO<sub>4</sub> method with full-length Kip2 promoter or Kip2 promoter deletion constructs provided by Dr. S. Okret (Huddinge University Hospital, Sweden).<sup>4</sup> To analyze E-box activity, HeLa cells were transfected with (4RTK-luc)<sup>5</sup> reporter and a plasmid encoding either wtE47 or E47mer.<sup>3</sup> Sixteen hours after transfection, the culture medium was changed and maintained for 48 h with or without tamoxifen.

Human Kip2 cDNA was cloned from pBluescriptR (Open Biosystems, Huntsville, AL) into the MSCV-IRES-GFP vector.<sup>6</sup> Lentivirus expressing the insulin promoter driving green fluorescent protein (GFP) was produced as previously

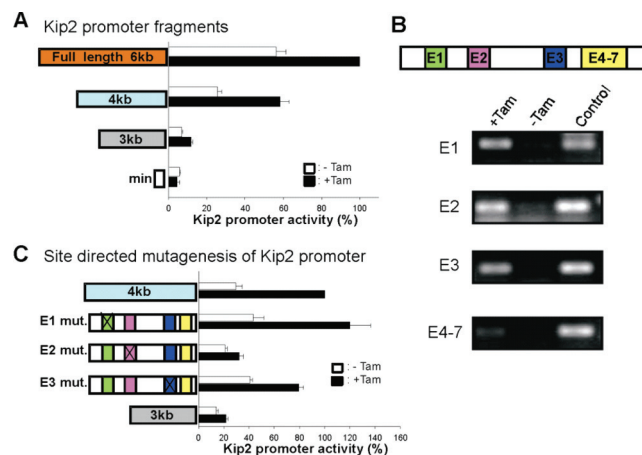

**FIG. S1.** Kip2 promoter responsiveness to E47. (A) A 6.3-kb and several shorter fragments from the 5' region of the Kip2 gene were cloned upstream of a luciferase reporter gene and luciferase activity measured in the absence and presence of 4  $\mu$ M tamoxifen, with the finding that the region responsive to E47 was localized to a 900-bp fragment between 3 and 4 kb 5' of the transcription start site. (B) This region was found to contain 7 E-box elements in 4 distinct locations, with E4-E7 clustered together. ChIP analysis revealed weak binding to the E4-E7 cluster and strong binding to E1-3. (C) Site-directed mutagenesis of E1 (green), E2 (magenta), and E3 (blue) demonstrated that only E2 was required for E47-responsiveness.

described.<sup>7</sup> For lentivirus expressing shKip2, 4 different siRNA target sequences were chosen from the open reading frame of human Kip2 (accession no. BC067842), using the siRNA selection algorithm from sfold (<http://sfold.wadsworth.org/>).

An H1 promoter-driven shRNA expression cassette was constructed by amplification of an oligonucleotide containing the entire shRNA, as described.<sup>8</sup> Each shRNA cassette was digested with XbaI and ligated into pBluescript. Validation of the construct was done by cotransfection with a plasmid expressing Kip2. The most effective shRNA cassette, as determined by Western blot, was transferred into a lentiviral vector for virus production.<sup>8,9</sup>

For Kip2 oligonucleotides, the start position is shown of the siRNA target sequence and the sequence of the oligonucleotide used for amplification: (shKip2-1448) 5'-CTGTCTAGACA AAAACCAAGGTGTAAGCTTTAATCTCTTGAATTAA AGCTTTACACCTTGGGG GGATCTGTGGTCTCATACA.

**RT-PCR.** Quantitative RT-PCR was performed on cDNA corresponding to 100 ng of RNA using the Opticon Real-Time

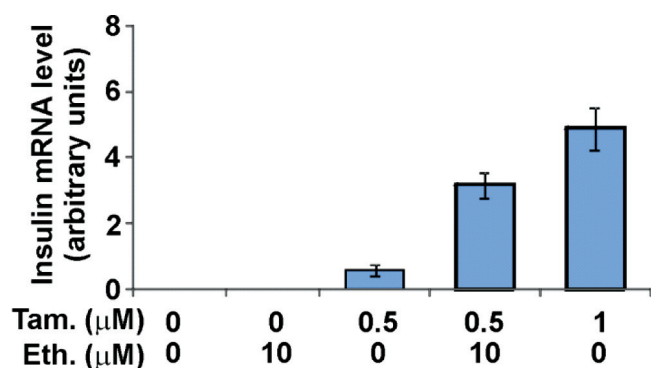

**FIG. S2.** Phenothiazines do not exhibit estrogenic behavior. T6PNE cells were exposed to tamoxifen (Tam.) for 3 days and/or ethopropazine (Eth.) for the final 48 h, followed by extraction of RNA and quantitative real-time RT-PCR for insulin and GAPDH. Insulin mRNA was normalized to GAPDH, which did not vary significantly between the samples. In the absence of tamoxifen, insulin mRNA was not induced by ethopropazine, demonstrating that ethopropazine did not exhibit activation of the E47<sup>MER</sup> fusion protein in a manner similar to tamoxifen. Error bars are SD of 3 biological replicates.

System (MJ Research, Waltham, MA) with SYBR Green. RT-PCR for GAPDH was used for normalization. To measure the number of copies of mRNA, standard curves were constructed by PCR with a known number of copies of the target sequence.

#### Primers:

Glucokinase for: gaaggaatgcttccgactcgttgg; rev: cacactg-cctcttcatgggtctc

SUR-1 for: cctcgtatccatcatcacagaa; rev: cagcttctctggcttatcgaac

Insulin, MafA, and GAPDH primers were described previously.<sup>10</sup>

**Western blot.** Whole-cell extracts were prepared by incubation in RIPA buffer containing protease inhibitors (Calbiochem, San Diego, CA). Protein (20  $\mu\text{g}$ ) was separated on 4% to 20% Longlife gels (LifeGels, Newcastle upon Tyne, UK) and transferred to Immobilon-P membrane (Millipore, Billerica, MA). After overnight blocking in phosphate-buffered saline–Tween (PBST) with 3% milk, membrane was incubated with Kip2 antibody (Santa Cruz Biotechnology, Santa Cruz, CA), followed by secondary antibody conjugated to horseradish peroxidase (Amersham/GE, Buckinghamshire, UK) and signal revealed by ECL (Amersham/GE).

**ChIP assay.** T6PNE cells treated with or without 10  $\mu\text{M}$  tamoxifen were treated with formaldehyde for in vivo cross-linking of Kip2 promoter and E47. Cross-linking was quenched by addition of glycine. The cells were then harvested by centrifugation resuspended in lysis buffer, according to the EZ-ChIP protocol (Upstate, Billerica, MA).

Cellular DNA was sheared by sonication and immunoprecipitated with E47 antibody (Santa Cruz Biotechnology). Following purification, PCR was used to analyze immunoprecipitated DNA. PCR of 10 ng DNA was performed with E-box oligonucleotide primers from the region between 4 kb and 3 kb in Kip2 promoter deletion constructs. PCR products were analyzed by electrophoresis on 1.2% agarose gels.

#### First:

F: 5' GGGGCGTTACATACCCTAA

R: 5' CCACCAACCCAGCTAATTT

#### Second:

F: 5' AAGCCTGGGCAACATAGAGA

R: 5' TAGAGGGCGTCTTGCTCTGT

#### Third:

F: 5' CAATCCTGGTGGATCTTCGT

R: 5' CAGTGTGTTTGCTCTGGAA

#### Fourth to sixth:

F: 5' TTCCAGAGGCAAACACACTG

R: 5' CATTCTAGCCCTGTGAAGC

**Mutagenesis study.** The 4-kb Kip2 deletion construct was used to make point mutations in each E-box between 4 kb and 3 kb by the QuikChange II XL Site-Directed Mutagenesis kit (Stratagene, La Jolla, CA).

The PCR-based protocols were allowed to proceed for 18 cycles with each E-box point-mutated primers. The product was treated with Dpn I restriction enzyme at 37 °C for 1 h to digest the parental DNA template and to select for mutation containing synthesized DNA. The mutated DNA was transformed in XL10-Gold Ultracompetent cells and purified with Endo-free Plasmid Maxi kit (QIAGEN, Valencia, CA).

#### Kip2 promoter (Sac4.0) first E-box mutation primer:

5'-GGAGACCAAGGCCGGGCTCGCTTG-3'

5'-CAAGCGAGCCCCGGCCTTGGTCTCC-3'

#### Kip2 promoter (Sac4.0) second E-box mutation primer:

5'-GGTGTGGTGGGAATTCCTGTGGTCC-3'

5'-CCACACCACCTTAAGGACACCAGG-3'

#### Kip2 promoter (Sac4.0) third E-box mutation primer:

5'-TCGTTAAGCCCGGTTTCCCAGGGG-3'

5'-CCCCTGGGAAACCGGGCTTAACGA-3'

**Luciferase and CAT assays.** Cells transfected with Kip2 promoter constructs driving a luciferase reporter gene as well as CMV-CAT were harvested with lysis buffer. Kip2 promoter activity was measured by the Luciferase Reporter Gene Assay kit (Roche, Basel, Switzerland), and data were normalized to CAT activity (Roche).<sup>1</sup>

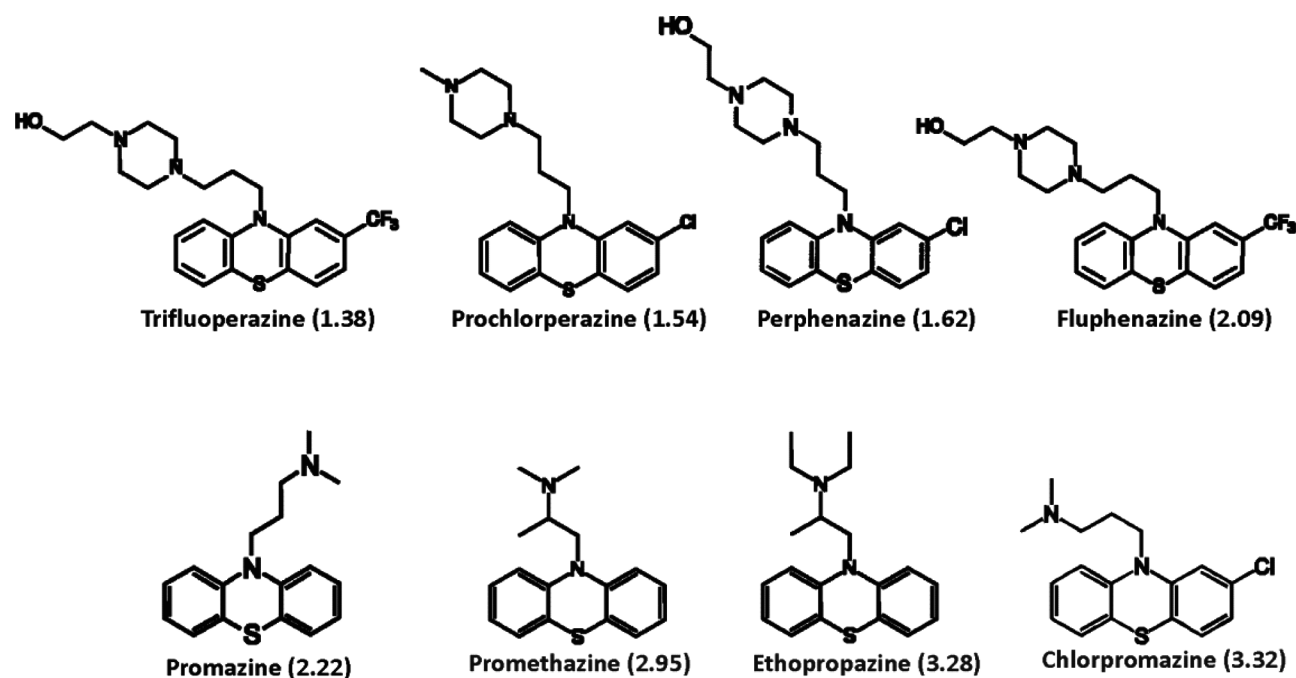

**FIG. S3.** Structure-activity relationship of phenothiazine compounds from the NIH/JDRF library. Numbers in parentheses are the fold change in green fluorescent protein (GFP) fluorescence in T6PNE cells induced by that compound (taken from Fig. 5B).

**Immunohistochemistry.** Immunostaining was performed on monolayers fixed with 4% paraformaldehyde and blocked with 5% donkey serum (Jackson ImmunoResearch Laboratories, West Grove, PA) and 1% bovine serum albumin (Sigma, St. Louis, MO) in PBS. Primary antibodies were mouse monoclonal anti-E47 (Santa Cruz Biotechnology), mouse anti-Kip2 (Diagnostic BioSystems, Pleasanton, CA), and mouse anti-BrdU (GE). Secondary antibodies were Rhodamine red donkey anti-mouse (Jackson ImmunoResearch Laboratories) and fluorophore-labeled donkey anti-mouse (Alexa Fluor 488, Molecular Probes, Eugene, OR). Samples were mounted in Vectashield (Vector Labs, Burlingame, CA). Digital images of stained sections were captured using a fluorescence microscope with a digital camera (Nikon, Tokyo, Japan).

**Arrays and analysis.** Microarray analysis was used to determine genes expressed in T6PNE cells. RNA isolated from T6PNE cells treated with and without tamoxifen was assayed for the expression of 24,000 human genes using Illumina BeadArray microarrays and Bead Studio software. Microarray data have been submitted in MIAME-compliant format to the Gene Expression Omnibus (GEO) database (GSE18821).

### High-throughput screening

**Compound library screening.** T6PNE cells expressing the insulin-eGFP transgene were plated at 2000 cells per well in a

384-well plate in the presence of 0.5  $\mu$ M tamoxifen to induce a submaximal level of insulin expression. That dose of tamoxifen was chosen to allow the screen to be particularly sensitive to compounds that upregulated insulin promoter activity. A higher dose of tamoxifen would be optimal to detect compounds that inhibited the insulin promoter. Compound addition was performed 24 h after tamoxifen administration with the BiomekFX (Beckman Coulter, Fullerton, CA). This was done by adding a single compound from the NIH/JDRF Custom Collection compound library (MicroSource Discovery Systems, Gaylordsville, CT). All compounds were to a final concentration in the well of 5  $\mu$ M. Forty-eight hours after compound addition, the cells were fixed in 4% paraformaldehyde and stained with DAPI (0.167  $\mu$ g/mL) to allow DNA content on a per cell basis (a surrogate for cell number) to be measured. The plates were stored in 50% glycerol.

**Image acquisition and analysis.** Images were obtained on a Beckman Coulter IC 100 high-throughput microscopy system equipped with a Hamamatsu ORCA-ER scientific camera using a Nikon S Fluor 10  $\times$  NA 0.5 objective. Each 384-well plate was scanned and DAPI (40 ms integration time), GFP (200 ms integration time), and RFP channels were collected at one 3-color, 1280  $\times$  1024 image per well.

Images of each well were captured in the blue channel to evaluate DAPI fluorescence as a measure of cell number, the green channel to assess expression of the insulin promoter-GFP

Table S1. Islet-Enriched Genes Expressed in T6PNE Cells Treated with Tamoxifen

|               |          |                                                                           |
|---------------|----------|---------------------------------------------------------------------------|
| GI_5032100-S  | ABCC5    | MRP5; SMRP; ABC33; MOATC; MOAT-C; pABC11; EST277145                       |
| GI_11545766-S | ABHD4    | FLJ12816                                                                  |
| GI_21327681-S | ACADM    | MCAD; ACAD1; MCADH                                                        |
| GI_4557232-S  | ACADS    | SCAD; ACAD3                                                               |
| GI_7710156-A  | ACHE     | YT                                                                        |
| GI_13325060-S | ACTR1B   | ARP1B; CTRN2                                                              |
| GI_10862690-S | ACVR1    | ALK2; SKR1; ACTRI; ACVRLK2                                                |
| GI_7662201-S  | ADAMTSL2 |                                                                           |
| GI_4501944-S  | ADM      | AM                                                                        |
| GI_6138971-S  | ADRBK1   | GRK2; BARK1; BETA-ARK1                                                    |
| GI_26787963-A | AGPAT1   | G15; LPAATA; MGC4007; MGC5423; 1-AGPAT1; LPAAT-alpha                      |
| GI_6041664-S  | AGPAT2   | BSC1; BSCL1; LPAAB; LPAAT-beta                                            |
| GI_4501992-S  | AGPS     | ADAS; ADPS; ADAP-S; ADHAPS; ALDHPSY                                       |
| GI_24469782-S | AGTRAP   | ATRAP                                                                     |
| GI_41107701-S | AHDC1    |                                                                           |
| GI_4502010-S  | AK1      |                                                                           |
| GI_7657354-S  | AKAP8L   |                                                                           |
| GI_24497580-S | AKR1C1   | C9; DD1; DDH; DDH1; H-37; MBAB; HAKRC; MGC8954; 2-ALPHA-HSD; 20-ALPHA-HSD |
| GI_24497581-S | AKR1C2   | DD; DD2; BABP; DDH2; HBAB; HAKRD; MCDR2; AKR1C-pseudo                     |
| GI_4885060-S  | AKT1     | PKB; RAC; PRKBA; RAC-ALPHA                                                |
| GI_34577109-A | ALDOA    | ALDA; MGC10942; MGC17716; MGC17767                                        |
| GI_31541901-S | AMBP     | HCP; ITI; UTI; ITIL                                                       |
| GI_21071002-A | AMFR     | GP78; RNF45                                                               |
| GI_4502094-S  | ANPEP    | CD13; LAP1; PEPN; gp150                                                   |
| GI_9625245-S  | ANXA10   | ANX14                                                                     |
| GI_22027652-A | AP1B1    | ADTB1; BAM22; AP105A; CLAPB2                                              |
| GI_16950626-A | AP1S1    | AP19; CLAPS1; SIGMA1A                                                     |
| GI_19913415-A | AP2A1    | ADTAA; CLAPA1; AP2-ALPHA                                                  |
| GI_11038642-A | AP2S1    | AP17; CLAPS2; AP17-DELTA                                                  |
| GI_7705786-S  | APH-1A   | APH1A; CGI-78                                                             |
| GI_6995997-S  | ARF1     |                                                                           |
| GI_28416434-A | ARFGAP1  | ARF1GAP; MGC39924; HRIHFB2281                                             |
| GI_28416437-S | ARFGAP3  | ARFGAP1                                                                   |
| GI_33466360-S | ARFRP1   | ARP                                                                       |
| GI_34147601-S | ARHGDI   | GDIA1; RHOGDI                                                             |
| GI_15011971-S | ARHGEF1  | GEF1; LBCL2; SUB1.5; P115-RHOGEF                                          |
| GI_15011976-S | ARHGEF16 | NBR; GEF16                                                                |
| GI_8923906-A  | ARL6IP4  | SR-25; SRp25                                                              |
| GI_20127415-S | ARNTL    | TIC; JAP3; MOP3; BMAL1; MGC47515                                          |
| GI_22748652-S | ARRDC1   |                                                                           |
| GI_18373304-S | ARRDC2   |                                                                           |
| GI_4502246-S  | ARVCF    |                                                                           |
| GI_30089993-A | ASB7     | FLJ22551                                                                  |
| GI_9966896-S  | ATP13A1  |                                                                           |
| GI_28373114-A | ATP2A3   | SERCA3                                                                    |
| GI_34335257-S | ATP6V0D1 | P39; VATX; Vma6; ATP6D; ATP6DV; VPATPD                                    |
| GI_22538424-S | ATPAF2   | ATP12; ATP12p; MGC29736                                                   |
| GI_15451880-A | B3GALT5  | B3T5; GLCT5; B3GalTx; B3GalT-V; beta3Gal-T5                               |
| GI_12408653-S | B3GAT3   | GLCATI; GlcAT-I                                                           |
| GI_14670387-A | BAD      | BBC2; BCL2L8                                                              |
| GI_5453564-A  | BAIAP2   | BAP2; IRSP53                                                              |
| GI_15451913-S | BAIAP3   | BAP3; KIAA0734                                                            |
| GI_5031608-S  | BCKDK    |                                                                           |
| GI_20336474-A | BCL7B    |                                                                           |
| GI_32698935-S | BCL9L    | DLNB11                                                                    |
| GI_21536418-S | BIK      | BP4; NBK; BBC1; BIP1                                                      |
| GI_21536416-A | BIN1     | AMPH2; AMPHL; SH3P9; MGC10367; DKFZp547F068                               |
| GI_20127587-S | BIN3     |                                                                           |
| GI_13123777-S | BRUNOL4  | CELF4; BRUNOL-4                                                           |
| GI_20127579-S | BTBD2    | FLJ20386                                                                  |
| GI_28872718-S | BTG2     | PC3; TIS21                                                                |

(continued)

Insulin Promoter Screen

Table S1. (continued)

|               |           |                                            |
|---------------|-----------|--------------------------------------------|
| GI_37551029-S | C100rf38  |                                            |
| GI_7019334-S  | C110rf9   | KIAA0954; MGC10781                         |
| GI_13124889-S | C120rf8   | ERP28; ERP29; ERp31; PDI-DB                |
| GI_18491027-S | C150rf15  | L30; RLP24; RPL24; RPL24L; HRP-L30-iso     |
| GI_27734946-S | C150rf26  |                                            |
| GI_21700762-S | C160rf34  | HN1L; FLJ13092                             |
| GI_4757805-S  | C160rf7   | ATP-BL                                     |
| GI_37552310-S | C190rf20  |                                            |
| GI_34098936-S | C190rf6   | ASBABP1; MGC4022; R32184_3                 |
| GI_27363487-S | C1QG      | C1QC                                       |
| GI_34222385-S | C1QL1     |                                            |
| GI_32967299-A | C1QTNF6   | CTRP6; ZACRP6                              |
| GI_34147371-S | C200rf149 | MGC2479; FLJ21046; dJ697K14.9              |
| GI_31542254-S | C200rf160 | dJ310013.5                                 |
| GI_23510349-A | C200rf161 | SNX-L; SNX21; PP3993; MGC29895; dJ337018.4 |
| GI_31341351-S | C200rf178 | Shax1; CHMP4A; CHMP4B; dJ553F4.4           |
| GI_8923517-S  | C200rf27  | FLJ20550                                   |
| GI_34147345-S | C200rf67  | PCIF1                                      |
| GI_20127520-S | C220rf5   | HS506A; DKFZP586A1024                      |
| GI_31542710-S | C20rf18   |                                            |
| GI_20070263-S | C20rf30   |                                            |
| GI_24308070-S | C20rf32   |                                            |
| GI_27544938-S | C30rf10   |                                            |
| GI_20149669-S | C60rf106  |                                            |
| GI_8393383-S  | C60rf48   | G8; D6S57                                  |
| GI_27478738-S | C90rf150  | MGC46502                                   |
| GI_34147359-S | C90rf16   | MGC4639; EST00098; FLJ12823                |
| GI_27734964-S | C90rf75   |                                            |
| GI_9951925-S  | CA4       | CAIV                                       |
| GI_34147521-S | CABC1     |                                            |
| GI_32698883-S | CABP7     | MGC57793                                   |
| GI_27597079-S | CACNA1C   | CaV1.2; CCHL1A1; CACNL1A1                  |
| GI_26051217-A | CAMK2B    | CAM2; CAMK2; CAMKB; MGC29528               |
| GI_26667190-A | CAMK2G    | CAMK; CAMKG; CAMK-II; MGC26678             |
| GI_12408655-S | CAPN1     | CANP; muCL; CANPL1; muCANP                 |
| GI_37577156-S | CAPN5     | HTRA3; nCL-3                               |
| GI_19923793-S | CARD10    | BIMP1; CARMA3                              |
| GI_10190681-S | CBX8      | PC3; RC1; HPC3                             |
| GI_4759075-S  | CCL20     | CKb4; LARC; ST38; MIP3A; MIP-3a; SCYA20    |
| GI_34147397-S | CCM2      |                                            |
| GI_34328914-A | CD151     | GP27; SFA1; PETA-3                         |
| GI_5174408-S  | CD2BP2    |                                            |
| GI_21237760-S | CD81      | S5.7; TAPA1                                |
| GI_34147599-S | CD99      | MIC2; MIC2X; MIC2Y                         |
| GI_16357476-S | CDC34     | UBE2R1; E2-CDC34                           |
| GI_34452716-A | CDC42EP1  | CEP1; BORG5; MSE55; MGC15316               |
| GI_30089963-S | CDC42EP2  | CEP2; BORG1                                |
| GI_32528264-A | CDK10     | PISSLRE                                    |
| GI_4557440-S  | CDKN1C    | BWS; WBS; p57; BWCR; KIP2                  |
| GI_16945965-S | CENTB5    | KIAA1716                                   |
| GI_21264595-A | CENTD2    | ARAP1; KIAA0782                            |
| GI_8922520-S  | Cep72     |                                            |
| GI_16905523-S | CES1      | CEH; CES2; HMSE; SES1; HMSE1               |
| GI_6995995-S  | CFTR      | CF; MRP7; ABC35; ABCC7                     |
| GI_7706275-A  | CGI-38    |                                            |
| GI_10800418-S | CHGA      | CGA                                        |
| GI_34222219-S | CHPF      | CSS2; FLJ22678                             |
| GI_9951921-S  | CIB1      | CIB; KIP; SIP2-28; CALMYRIN                |
| GI_4502848-S  | CKAP1     | CG22; TBCB; CKAPI                          |
| GI_5803001-S  | CLCN2     | CLC2; ECA3; EGI3; EGMA; CIC-2              |
| GI_20070131-S | CLCN7     | CLC7; CLC-7; OPTA2                         |

(continued)

Table S1. (continued)

|               |          |                                                                                              |
|---------------|----------|----------------------------------------------------------------------------------------------|
| GI_5174418-S  | CLPP     |                                                                                              |
| GI_4502896-S  | CLPTM1   |                                                                                              |
| GI_32483393-A | CLTB     | LCB                                                                                          |
| GI_4502904-S  | CLU      | CLI; APOJ; SGP2; SGP-2; SP-40; TRPM2; TRPM-2; MGC24903                                       |
| GI_29789254-A | CMIP     | KIAA1694                                                                                     |
| GI_7657386-S  | CNOT3    | NOT3; LENG2; NOT3H; KIAA0691                                                                 |
| GI_22095394-S | COASY    |                                                                                              |
| GI_17738300-S | COL7A1   | EBD1; EBR1; EBDCT                                                                            |
| Systematic    | Common   | Synonyms                                                                                     |
| GI_6466449-A  | COMT     |                                                                                              |
| GI_7705806-S  | COQ4     | CGI-92                                                                                       |
| GI_14149733-S | COR01B   | CORONIN-2; DKFZP762I166                                                                      |
| GI_14249581-S | COR06    |                                                                                              |
| GI_38327637-S | CREB3    | LZIP; LUMAN; MGC15333; MGC19782                                                              |
| GI_16418354-S | CREB3L1  |                                                                                              |
| GI_22095396-S | CRELD1   | AVSD2; CIRRN; DKFZP566D213                                                                   |
| GI_21361081-S | CRLF1    | NR6; CISS; CLF-1                                                                             |
| GI_21359983-S | CSDA     | DBPA; ZONAB                                                                                  |
| GI_42658675-S | CSG1cA-T |                                                                                              |
| GI_21314777-S | CSNK1G2  | CK1g2                                                                                        |
| GI_4503126-S  | CTNNA1   | CAP102                                                                                       |
| GI_22749312-S | CUZD1    |                                                                                              |
| GI_4506850-S  | CXCL6    | GCP2; CKA-3; GCP-2; SCYB6                                                                    |
| GI_4557504-S  | CYBA     |                                                                                              |
| GI_23957705-S | CYBASC3  |                                                                                              |
| GI_19923602-S | CYBRD1   | DCYTB; FLJ23462                                                                              |
| GI_38454323-S | CYGB     | HGB; STAP                                                                                    |
| GI_34222286-S | CYR61    | CCN1; GIG1; IGFBP10                                                                          |
| GI_4557510-S  | DAPK3    | ZIP; ZIPK                                                                                    |
| GI_13259507-A | DCTN1    | P135; DP-150; DAP-150                                                                        |
| GI_34335254-S | DCTN2    | RBP50; DCTN50; DYNAMITIN                                                                     |
| GI_34147657-S | DDIT3    | CHOP; CEBPZ; CHOP10; GADD153                                                                 |
| GI_38327631-A | DDR1     | CAK; DDR; NEP; PTK3; RTK6; TRKE; CD167; EDDR1; MCK10; NTRK4; PTK3A                           |
| GI_19743936-S | DDX27    | RHLP; Rrp3p; PP3241; HSPC259; MGC1018; FLJ12917; FLJ20596; FLJ22238; dJ686N3.1; DKFZp667N057 |
| GI_34222345-S | DDX49    | FLJ10432; R27090_2                                                                           |
| GI_19923594-S | DDX54    | DP97; APR-5; MGC2835                                                                         |
| GI_14670395-A | DEDD     | DEFT; KE05; DEDD1; FLDED1; CASP8IP1                                                          |
| GI_20537349-S | DFNB31   |                                                                                              |
| GI_7382489-S  | DGAT1    | DGAT; ARGPI                                                                                  |
| GI_13027629-S | DGCR14   | ES2; DGS1; DGS-I; Ese2el                                                                     |
| GI_4826693-S  | DGCR2    | IDD; LAN; DGS-C; SEZ-12; KIAA0163                                                            |
| GI_15718677-S | DGCR6L   | FLJ10666                                                                                     |
| GI_31742531-S | DIAPH1   | DRF1; DFNA1; LFHL1; hDIA1                                                                    |
| GI_34335250-A | DLGAP4   |                                                                                              |
| GI_5031770-S  | DNAJC4   | HSPF2; MCG18; DANJC4                                                                         |
| GI_4826699-S  | DNM2     | DYNII                                                                                        |
| GI_40217610-S | DOCK6    | KIAA1395                                                                                     |
| GI_20070301-S | DOK4     | FLJ10488                                                                                     |
| GI_29544739-A | DOK5     | MGC16926; C200rf180                                                                          |
| GI_4758189-S  | DPEP1    | MDP; RDP                                                                                     |
| GI_24430133-I | DPM3     | MGC34275                                                                                     |
| GI_18426972-S | DRAP1    | NC2-alpha                                                                                    |
| GI_9257200-S  | DRD1IP   |                                                                                              |
| GI_24308252-S | DTX2     | RNF58; KIAA1528                                                                              |
| GI_28872752-S | DUOX2    | LN0X2; THOX2; NOXEF2; P138-TOX                                                               |
| GI_4758215-S  | DVL2     |                                                                                              |
| GI_12669914-S | E2F4     | E2F-4                                                                                        |
| GI_12669916-S | E2F5     | E2F-5                                                                                        |
| GI_4503446-S  | ECH1     | HPXEL                                                                                        |
| GI_12707569-S | ECHS1    | SCEH                                                                                         |
| GI_25453470-S | EEF1A2   | HS1; STN; EF1A; EEF1AL; EF-1-alpha-2                                                         |

(continued)

Insulin Promoter Screen

Table S1. (continued)

|               |          |                                                                     |
|---------------|----------|---------------------------------------------------------------------|
| GI_25453476-S | EEF2     | EF2; EEF-2                                                          |
| GI_37059736-S | EFHD2    |                                                                     |
| GI_33359679-A | EFNA1    | B61; EFL1; ECKLG; EPLG1; LERK1; TNFAIP4                             |
| GI_20127546-S | EGFL7    | ZNEU1                                                               |
| GI_18141577-A | EGLN2    | EIT6; PHD1; HIFPH1; DKFZp434E026                                    |
| GI_4503516-S  | EIF3S4   | EIF3-P42; eIF3-p44; eIF3-delta                                      |
| GI_38201618-A | EIF4G1   | p220; EIF4G                                                         |
| GI_11496880-S | ELK1     |                                                                     |
| GI_13489092-S | ELOVL1   | Ssc1; CGI-88                                                        |
| GI_19263346-S | EMID2    |                                                                     |
| GI_14042987-S | EMILIN2  | FOAP-10; EMILIN-2; FLJ33200                                         |
| GI_4503562-S  | EMP3     | YMP                                                                 |
| GI_4557420-S  | ENTPD2   | CD39L1; NTPDase-2                                                   |
| GI_4557422-S  | ENTPD6   | CD39L2; IL6ST2; IL-6SAG; NTPDase-6; dJ738P15.3                      |
| GI_32967310-S | EPHA2    | ECK                                                                 |
| GI_7019368-S  | EPN1     |                                                                     |
| GI_24307980-S | EXOSC7   | RRP42                                                               |
| GI_32698727-S | FAM20C   | DKFZp547D065                                                        |
| GI_4758219-S  | FAM50A   | 9F; XAP5; HXC-26                                                    |
| GI_12232376-S | FANCF    | FAF                                                                 |
| GI_16933539-S | FAP      | FAPA; DPPIV; SEPRASE                                                |
| GI_14971419-A | FASTK    | FAST; FLJ13079                                                      |
| GI_16306579-S | FBXL11   | FBL7; CXXC8; FBL11; LILINA; FLJ00115; KIAA1004; DKFZP434M1735       |
| GI_30749197-A | FBXW5    | MGC20962; DKFZP434B205                                              |
| GI_14150057-S | FBXW9    |                                                                     |
| GI_8923788-S  | FEV      | FEV; PET-1                                                          |
| GI_13112049-A | FGFR4    | TKF; JTK2                                                           |
| GI_17149850-S | FKBP8    | FKBP38; FKBP38                                                      |
| GI_22547155-S | FLII     | FLI; FLIL; Fli1; MGC39265                                           |
| GI_19923809-S | FLJ20254 |                                                                     |
| GI_8923451-S  | FLJ20489 |                                                                     |
| GI_42662787-S | FLJ39609 |                                                                     |
| GI_42491369-S | FLJ43806 |                                                                     |
| GI_4503744-S  | FLNA     | FLN; FMD; MNS; ABPX; FLN1; NHBP; OPD1; OPD2; ABP-280                |
| GI_4758393-S  | FLOT2    | ESA; ECS1; ESA1; ECS-1; M17S1                                       |
| GI_24497503-A | FOXA2    | HNF3B; TCF3B; MGC19807                                              |
| GI_4557023-S  | FOXJ1    | HFH4; HFH-4; FKHL13                                                 |
| GI_22024384-S | FPGS     |                                                                     |
| GI_17738307-S | FREQ     | FLUP; NCS1; NCS-1; DKFZp761L1223                                    |
| GI_27754767-A | FXYD2    | HOMG2; ATP1G1; MGC12372                                             |
| GI_33620741-S | FZR1     | FZR; FZR2; HCDH; HCDH1; KIAA1242                                    |
| GI_20070269-S | G0S2     |                                                                     |
| GI_11496988-S | GAA      | LYAG                                                                |
| GI_9945331-S  | GADD45B  | MYD118; GADD45BETA; DKFZP566B133                                    |
| GI_4557616-S  | GAS6     | AXSF; AXLLG                                                         |
| GI_21361907-S | GBL      |                                                                     |
| GI_20302161-S | GCG      | GLP1; GLP2; GRPP                                                    |
| GI_6382072-S  | GCHFR    | GFRP; HsT16933                                                      |
| GI_4503970-S  | GD11     | GDIL; MRX41; MRX48; OPHN2; XAP-4; RHOGDI; RABGD1A; RABGDIA          |
| GI_28416951-S | GIMAP1   | HIMAP1; IMAP38                                                      |
| GI_37540877-S | GLCE     |                                                                     |
| GI_34147552-S | GLI4     | HKR4                                                                |
| GI_31543062-S | GLYCTK   |                                                                     |
| GI_13435378-S | GMEB2    | PIF79; P79PIF; KIAA1269                                             |
| GI_4504040-S  | GNAI2    | GIP; GNAI2B                                                         |
| GI_18426899-A | GNAS     | AHO; GSA; GSP; POH; GPSA; NESP; GNAS1; PHP1A; PHP1B; GNASXL; NESP55 |
| GI_4885288-S  | GNL1     | HSR1                                                                |
| GI_4504068-S  | GOT2     |                                                                     |
| GI_13435380-S | GPS1     | COPS1                                                               |
| GI_4504106-S  | GPX4     | snGPx                                                               |
| GI_37552421-S | GRINA    |                                                                     |

(continued)

Table S1. (continued)

|               |          |                                                                                                                        |
|---------------|----------|------------------------------------------------------------------------------------------------------------------------|
| GI_4504140-S  | GRM4     | mGlu4; GPRC1D; MGLUR4                                                                                                  |
| GI_4504150-S  | GRN      | PEPI; PCDGF                                                                                                            |
| GI_4753160-S  | GTF3C1   | TFIIIC; TFIIIC220; TFIIICalpha                                                                                         |
| GI_6912587-S  | GTPBP6   |                                                                                                                        |
| GI_34147566-S | GUK1     | GMK                                                                                                                    |
| GI_33285007-S | GYLTL1B  | FLJ35207                                                                                                               |
| GI_38327035-S | HAGH     | GL02; GLXII; HAGH1                                                                                                     |
| GI_8923535-S  | HCFC1R1  | HPIP; FLJ20568                                                                                                         |
| GI_38327036-S | HCN3     | KIAA1535                                                                                                               |
| GI_13128861-S | HDAC3    | HD3; RPD3; RPD3-2                                                                                                      |
| GI_5729867-S  | HERC2    | jd2; p528; D15F37S1; KIAA0393                                                                                          |
| GI_7705930-S  | HERC5    |                                                                                                                        |
| GI_13128865-S | HEXA     | TSD                                                                                                                    |
| GI_19923414-S | HEYL     |                                                                                                                        |
| GI_4504380-S  | HGD      | AKU; HGO                                                                                                               |
| GI_24496766-S | HGS      | HRS; ZFYVE8                                                                                                            |
| GI_5901965-S  | HHLA3    |                                                                                                                        |
| GI_8923568-S  | HIF1AN   | FIH1; FLJ20615; FLJ22027; DKFZp762F1811                                                                                |
| GI_24797066-S | HLA-A    |                                                                                                                        |
| GI_30581114-A | HM13     | H13; SPP; IMP1; PSL3; IMPAS; PSENL3; dJ324017.1                                                                        |
| GI_4557644-S  | HNRPL    | hnRNP-L                                                                                                                |
| GI_4758565-S  | HS6ST1   | HS6ST                                                                                                                  |
| GI_41055988-S | HSMPP8   |                                                                                                                        |
| GI_13699861-S | HYOU1    | ORP150                                                                                                                 |
| GI_13027623-S | HYPE     | MGC5623; UNQ3041                                                                                                       |
| GI_23503262-S | IBRDC3   |                                                                                                                        |
| GI_24797154-A | ICMT     | PCMT; PPMT; PCCMT; HSTE14; MST098; MSTP098; MGC39955                                                                   |
| GI_21361365-S | IFRD2    | SM15; IFNRP; SKMc15                                                                                                    |
| GI_6453816-S  | IGF2     |                                                                                                                        |
| GI_10835156-S | IGFBP2   | IBP2                                                                                                                   |
| GI_10835020-S | IGFBP4   | IBP4                                                                                                                   |
| GI_24430200-A | IL17RC   | IL17-RL; MGC10763                                                                                                      |
| GI_28610153-S | IL8      | K60; NAF; GCP1; IL-8; LECT; LUCT; NAP1; 3-10C; CXCL8; GCP-1; LYNAIP; MDNCF; MONAP; NAP-1; SCYB8; TSG-1; AMCF-I; b-ENAP |
| GI_29171685-A | ILKAP    | MGC4846; FLJ10181; PP2C-DELTA; DKFZP434J2031                                                                           |
| GI_4557670-S  | INS      |                                                                                                                        |
| GI_4557883-S  | INSR     |                                                                                                                        |
| GI_4557672-S  | IPF1     | IUF1; PDX1; IDX-1; MODY4; PDX-1; STF-1                                                                                 |
| GI_24308114-S | IRF2BP1  | DKFZP434M154                                                                                                           |
| GI_4809285-A  | IRF7     | IRF7A                                                                                                                  |
| GI_21902536-S | ISYNA1   |                                                                                                                        |
| GI_6006010-A  | ITGA3    | VL3A; CD49C; GAPB3; MSK18; VCA-2; VLA3a; GAP-B3                                                                        |
| GI_21359893-S | ITPK1    | ITRPK1                                                                                                                 |
| GI_21704285-S | JAM3     | FLJ14529                                                                                                               |
| GI_30154219-S | JMJD3    |                                                                                                                        |
| GI_12056467-A | JUP      | DP3; PDGB; PKGB; DPIII                                                                                                 |
| GI_5031816-S  | KATNB1   | KAT                                                                                                                    |
| GI_9506650-S  | KCTD5    | FLJ20040                                                                                                               |
| GI_7662179-S  | KIAA0562 |                                                                                                                        |
| GI_24308018-S | KIAA0664 |                                                                                                                        |
| GI_7662439-S  | KIAA1001 | ARSG                                                                                                                   |
| GI_37546881-S | KIAA1414 |                                                                                                                        |
| GI_21314680-S | KIAA1598 | FLJ11122                                                                                                               |
| GI_40548407-I | KIAA1967 | DBC1; KIAA1967                                                                                                         |
| GI_13699823-S | KIF11    | EG5; HKSP; KNSL1; TRIP5                                                                                                |
| GI_32307167-S | KIF1A    |                                                                                                                        |
| GI_19923320-S | KIFC3    |                                                                                                                        |
| GI_5032176-S  | KLF10    | EGRA; KLF10; TIEG1                                                                                                     |
| GI_4557700-S  | KRT17    | PC; K17; PC2; PCHC1                                                                                                    |
| GI_40354194-I | KRT18    | K18; CYK18                                                                                                             |
| GI_4504918-S  | KRT8     | K8; KO; CK8; CYK8; K2C8; CARD2                                                                                         |

(continued)



Insulin Promoter Screen

Table S1. (continued)

|               |           |                                                                           |
|---------------|-----------|---------------------------------------------------------------------------|
| GI_28212273-S | L3MBTL4   |                                                                           |
| GI_13569871-S | LBH       | DKFZP566J091                                                              |
| GI_38455401-S | LCN2      | NGAL                                                                      |
| GI_14150030-S | LDOC1L    |                                                                           |
| GI_23308571-S | LENG4     | BB1                                                                       |
| GI_6912481-S  | LETM1     |                                                                           |
| GI_6006018-S  | LIF       | CDF; HILDA; D-FACTOR                                                      |
| GI_4758679-S  | LLGL2     | HGL                                                                       |
| GI_5803022-S  | LMAN2     | GP36B; VIP36; C50rf8                                                      |
| GI_27436944-A | LMNA      | FPL; LFP; EMD2; FPLD; HGPS; LDP1; LMN1; LMNC; PR01; CMD1A; CMT2B1; LGMD1B |
| GI_37700248-S | LOC253012 |                                                                           |
| GI_37542183-S | LOC339123 |                                                                           |
| GI_40786401-S | LOC374395 |                                                                           |
| GI_31543092-S | LOC89944  |                                                                           |
| GI_24308395-S | LOC90379  |                                                                           |
| GI_37541526-S | LOC92154  |                                                                           |
| GI_12232394-S | LPPR2     | FLJ13055                                                                  |
| GI_4758685-S  | LRP1      | APR; LRP; A2MR; CD91; APOER                                               |
| GI_4505014-S  | LRP3      |                                                                           |
| GI_4758689-S  | LRRFIP1   | GCF2; TRIP; GCF-2; FLAP-1; HUF1-1; FLIIP1; MGC10947                       |
| GI_7706422-S  | LSM7      | YNL147W                                                                   |
| GI_6996015-A  | LTB       | p33; TNFC; TNFSF3                                                         |
| GI_31543105-S | LU        | AU; BCAM; MSK19                                                           |
| GI_4505048-S  | LY6E      | RIGE; SCA2; RIG-E; SCA-2; TSA-1                                           |
| GI_20302149-S | LYPLA2    | APT-2; DJ886K2.4                                                          |
| GI_20127485-S | M6PRBP1   |                                                                           |
| GI_6006019-S  | MAD2L2    | REV7; MAD2B                                                               |
| GI_9257203-S  | MAEA      | EMP                                                                       |
| GI_31543135-S | MAF1      | DKFZp586G1123                                                             |
| GI_14249311-S | MAFG      |                                                                           |
| GI_9966902-S  | MAN1C1    | HMIC                                                                      |
| GI_10834967-S | MAN2B1    | MANB; LAMAN                                                               |
| GI_38202206-S | MAOB      | MGC26382                                                                  |
| GI_32481208-A | MAPKAPK2  |                                                                           |
| GI_9845486-A  | MARK2     | EMK1                                                                      |
| GI_13399295-S | MAZ       | PUR1; ZF87; SAF-1; SAF-2                                                  |
| GI_5174544-S  | MEF2D     |                                                                           |
| GI_13446228-S | MESDC1    |                                                                           |
| GI_24308008-S | METAP1    | KIAA0094                                                                  |
| GI_21362059-S | MGC13114  |                                                                           |
| GI_20070375-S | MGC15523  |                                                                           |
| GI_22749382-S | MGC9712   |                                                                           |
| GI_27486123-S | MICAL3    |                                                                           |
| GI_20070316-S | MID1IP1   | FLJ10386                                                                  |
| GI_4505184-S  | MIF       | GIF; GLIF; MMIF                                                           |
| GI_27436915-A | MINK1     | MGC21111                                                                  |
| GI_21361271-S | MLLT1     | ENL; LTG19                                                                |
| GI_13027797-S | MMP14     | MMP-X1; MTMMP1; MT1-MMP                                                   |
| GI_4759109-S  | MPDU1     | SL15; Lec35                                                               |
| GI_4505232-S  | MPG       | AAG; MDG; APNG                                                            |
| GI_23510449-S | MPST      | MST; TST2; MGC24539                                                       |
| GI_25306271-A | MRPL11    | L11mt; CGI-113                                                            |
| GI_27436900-S | MRPL12    | 5c5-2; L12mt; MRPL7; RPML12; MGC8610; MRPL7/L12; MRP-L31/34               |
| GI_21265079-S | MRPL18    | HSPC071; MRP-L18                                                          |
| GI_27436903-S | MRPL23    | RPL23; L23MRP; RPL23L                                                     |
| GI_26667176-S | MRPL46    | LIECG2; P2ECSL; C150rf4; MGC22762                                         |
| GI_16950590-A | MRPS12    | RPS12; RPMS12; RPSM12; MPR-S12; MT-RPS12                                  |
| GI_16554600-S | MRPS18A   | S18bmt; FLJ10548; MRPS18-3; HumanS18b; MRP-S18-3                          |
| GI_16579881-S | MRPS26    | GI008; RPMS13; MRP-S13; MRP-S26; NY-BR-87; DJ534B8.3                      |
| GI_4505256-S  | MSN       |                                                                           |
| GI_21956644-S | MTPN      | V-1; GCDP                                                                 |

(continued)

Table S1. (continued)

|               |         |                                            |
|---------------|---------|--------------------------------------------|
| GI_37541581-S | MUC5B   |                                            |
| GI_34147593-S | MUS81   | FLJ21012                                   |
| GI_31377612-S | MYADM   |                                            |
| GI_7657350-S  | MYBBP1A | P160; PAP2                                 |
| GI_33563339-S | MYH14   | NHMCII; FLJ13881; KIAA2034                 |
| GI_24415399-S | MYO1C   | myr2; MYO1E                                |
| GI_4505328-S  | NAPA    | SNAPA; ALPHASNAP; alpha SNAP               |
| GI_14042973-S | NCALD   |                                            |
| GI_19923386-S | NCBP2   | NIP1; CBP20                                |
| GI_24638432-S | NCSTN   | APH2; KIAA0253                             |
| GI_10800414-S | NDN     | HsT16328                                   |
| GI_28269680-S | NDUFA11 | B14.7                                      |
| GI_33519471-S | NDUFB7  | B18; CI-B18; MGC2480                       |
| GI_13375816-S | NEIL1   | NEI1; hFPG1; FLJ22402                      |
| GI_19923222-S | NFKB2   | LYT10; LYT-10                              |
| GI_26787990-S | NFKBIL1 | IKBL; NFKBIL                               |
| GI_11496977-S | NFYC    | HSM; CBFC; HAP5; CBF-C; NF-YC; HITF2A      |
| GI_4505394-S  | NID     | NID1; ENTACTIN                             |
| GI_31543289-S | NINJ1   | NIN1; NINJURIN                             |
| GI_32307133-S | NKX2-2  | NKX2B; NKX2.2                              |
| GI_41204930-S | NLF2    |                                            |
| GI_37693992-S | NME3    | DR-nm23                                    |
| GI_34147607-S | NOSIP   | CGI-25                                     |
| GI_20149616-S | NPDC1   | CAB; CAB-; CAB1; CAB-1; DKFZP586J0523      |
| GI_13430847-S | NR1D1   | EAR1; hRev; THRA1; THRAL; ear-1            |
| GI_21070966-A | NRXN1   | Hs.22998; KIAA0578                         |
| GI_21070970-A | NRXN3   | KIAA0743                                   |
| GI_38455392-S | NTHL1   | NTH1; OCTS3                                |
| GI_20070227-S | NUCB1   | NUC                                        |
| GI_34486089-S | OAZ1    | OAZ                                        |
| GI_8922715-S  | OGDHL   |                                            |
| GI_33286445-S | OGFR    |                                            |
| GI_8923113-S  | OTUB1   |                                            |
| GI_20070124-S | P4HB    | DSI; GIT; PDI; P04DB; P04HB; PROHB; ERBA2L |
| GI_7382497-S  | PAK4    |                                            |
| GI_21536446-S | PAK6    | PAK5                                       |
| GI_16418340-S | PANX2   | hPANX2                                     |
| GI_23097271-S | PAOX    | PAO; DKFZp434J245                          |
| GI_8394416-S  | PARD6A  | PAR-6; TAX40; PAR-6A; TIP-40; PAR6alpha    |
| GI_20127527-S | PARVB   | CGI-56; BK414D7.C22.1.MRNA                 |
| GI_14670372-A | PCBP4   | LIP4; MCG10                                |
| GI_42659678-S | PCNXL3  |                                            |
| GI_4505650-S  | PCYT2   | ET                                         |
| GI_4505694-S  | PDPK1   | PDK1; PR00461                              |
| GI_30061508-A | PDZK3   | AIPC; PIN1; PAPIN; PDZD2; KIAA0300         |
| GI_24415382-S | PELP1   | MNAR; P160                                 |
| GI_22538479-A | PEMT    | PNMT; PEAMT; PEMPT; PEMT2; MGC2483         |
| GI_28372500-S | PERLD1  | PP1498; AGLA546; MGC9753                   |
| GI_22507392-S | PERQ1   | GIGYF1; AF053356-CDS2                      |
| GI_22091458-S | PES1    | PES                                        |
| GI_24797087-A | PEX10   | NALD; RNF69; MGC1998                       |
| GI_4758899-S  | PFKFB3  | IPFK2                                      |
| GI_19923257-S | PFKFB4  |                                            |
| GI_16753216-A | PFN2    | PFL; D3S1319E                              |
| GI_21359898-S | PGEA1   | CBY; arb1; HS508115A                       |
| GI_6912585-S  | PGLS    | 6PGL                                       |
| GI_8923197-S  | PGPEP1  | PGP; Pcp; PGPI; PGP-I; FLJ20208            |
| GI_37595529-A | PHC2    | EDR2; HPH2                                 |
| GI_24475860-S | PHPT1   | CGI-202; HSPC141; DKFZp564M173             |
| GI_24850132-S | PIAS4   | MGC35296                                   |
| GI_22538452-A | PIGQ    | GPI1; hGPI1; MGC12693                      |

(continued)

Insulin Promoter Screen

Table S1. (continued)

|               |           |                                                                                 |
|---------------|-----------|---------------------------------------------------------------------------------|
| GI_23397652-S | PIGT      | CGI-06; MGC8909                                                                 |
| GI_4505808-S  | PIK4CB    | PI4Kbeta; PI4K-BETA                                                             |
| GI_30179910-A | PILRB     | FDFACT1; FDFACT2                                                                |
| GI_32483384-A | PKIG      |                                                                                 |
| GI_4506072-S  | PKN1      | DBK; PKN; PRK1                                                                  |
| GI_11386138-S | PLCB3     |                                                                                 |
| GI_41322918-I | PLEC1     | PCN; EBS1; EBSO; PLTN                                                           |
| GI_20070288-S | PLEKHA3   | FAPP1; FLJ20067                                                                 |
| GI_29789005-S | PLEKHC1   | MIG2; KIND2; mig-2; UNC112                                                      |
| GI_8922332-S  | PLEKHJ1   |                                                                                 |
| GI_34147645-S | PLOD3     | LH3                                                                             |
| GI_31543416-S | PLSCR3    |                                                                                 |
| GI_8923792-S  | PLXNA3    | HSSEXGENE                                                                       |
| GI_6005831-S  | PMF1      |                                                                                 |
| GI_5453923-S  | POLD2     |                                                                                 |
| GI_30089946-S | POLDIP2   |                                                                                 |
| GI_14589950-S | POLR2E    | RPB5; XAP4; RPABC1; hRPB25; hsRPB5                                              |
| GI_14589956-S | POLR2L    | RPB10; RPABC5; RPB7.6; hRPB7.6; hsRPB10b; RPB10beta                             |
| GI_42560241-I | POU5F1    | OCT3; OTF3; OTF4; Oct4; MGC22487                                                |
| GI_31543427-S | PPAN      | SSF1; MGC14226; MGC45852                                                        |
| GI_29826283-A | PPM1G     | PP2CG; PPP2CG; MGC1675; MGC2870; PP2CGAMMA                                      |
| GI_9790902-S  | PPP1R15A  | GADD34                                                                          |
| GI_4506026-S  | PPP4C     | PP4; PPX                                                                        |
| GI_20127496-S | PPP5C     | PP5; PPP5                                                                       |
| GI_7110696-S  | PRKCABP   | PICK1; dJ1039K5                                                                 |
| GI_35493938-S | ProSAPiP1 | KIAA0552                                                                        |
| GI_22538484-S | PRPSAP2   | PAP41                                                                           |
| GI_21071012-S | PRSS2     | TRY2; TRY8; TRYP2                                                               |
| GI_21614535-S | PRSS22    | BSSP-4; MGC9599; SP001LA; hBSSP-4                                               |
| GI_6912705-S  | PSD4      | EFA6B                                                                           |
| GI_7108359-A  | PSEN2     | AD4; PS2; AD3L; STM2                                                            |
| GI_24430154-A | PSMC4     | S6; TBP7; MIP224; MGC8570; MGC13687; MGC23214                                   |
| GI_25777599-S | PSMD1     | S1; P112                                                                        |
| GI_28605136-A | PSMD10    | p28                                                                             |
| GI_25777611-S | PSMD3     | S3; P58; RPN3                                                                   |
| GI_34147588-S | PTGES2    | GBF1; PGES2; C9orf15; FLJ14038; MGC11289                                        |
| GI_27886606-A | PTK7      | CCK4                                                                            |
| GI_34594666-S | PTMS      |                                                                                 |
| GI_14589853-A | PTP4A3    | PRL3; PRL-3; PRL-R                                                              |
| GI_18860905-S | PTPRN     | IA2; IA-2; ICA512; R-PTP-N; IA-2/PTP                                            |
| GI_19743920-A | PTPRS     | PTPSIGMA                                                                        |
| GI_19743928-A | PTPRT     | RPTPrho; KIAA0283                                                               |
| GI_19743932-A | PTPRU     | FMI; PTP; PCP-2; PTP-J; PTPRO; PTPU2; GLEPP1; PTP-PI; PTPPSI; hPTP-J; R-PTP-PSI |
| GI_34147590-S | PUS1      |                                                                                 |
| GI_23503258-S | PUSL1     |                                                                                 |
| GI_28195387-S | RAB11FIP4 | KIAA1821; MGC11316                                                              |
| GI_42734506-S | RAB26     | V46133                                                                          |
| GI_37550536-S | RAB43     |                                                                                 |
| GI_21361508-S | RAB4B     |                                                                                 |
| GI_13376207-S | RABEP2    | FLJ23282                                                                        |
| GI_33469950-A | RABGGTA   |                                                                                 |
| GI_23111014-I | RAI1      | SMS; SMCR; KIAA1820; MGC12824; DKFZP434A139                                     |
| GI_24307908-S | RALGDS    | RGF; RalGEF                                                                     |
| GI_40538735-S | RANBP10   | KIAA1464                                                                        |
| GI_19718756-S | RANBP2    | NUP358                                                                          |
| GI_38201688-S | RANGAP1   | Fug1; KIAA1835; MGC20266                                                        |
| GI_4506418-S  | RARA      | RAR; NR1B1                                                                      |
| GI_22027484-S | RASD1     | AGS1; DEXRAS1; MGC:26290                                                        |
| GI_37545358-S | RASL11A   |                                                                                 |
| GI_33457331-S | RAVER1    | KIAA1978                                                                        |
| GI_30181230-S | REG1B     | REGH; REGL; PPS2; REGI-BETA                                                     |

(continued)

Table S1. (continued)

|               |          |                                              |
|---------------|----------|----------------------------------------------|
| GI_35493877-S | RELB     | I-REL                                        |
| GI_18375672-S | RENT1    | UPF1; HUPF1; NORF1; pNORF1; KIAA0221         |
| GI_19923392-S | RERE     | ARG; ARP; DNB1; ATN1L; KIAA0458              |
| GI_34147664-S | RGS14    |                                              |
| GI_5031704-S  | RGS19    | GAIP; RGSGAIP                                |
| GI_10835048-S | RHOA     | RHOA; ARH12; RH012; RHOH12                   |
| GI_4502218-S  | RHOG     |                                              |
| GI_35493905-S | RIN2     | RASSF4                                       |
| GI_34878786-S | RNF25    | A07; FLJ13906                                |
| GI_37588854-A | RNF40    | BRE1B; RBP95; STARING; KIAA0661; MGC13051    |
| GI_20070295-S | RNPEPL1  | FLJ10806                                     |
| GI_17981705-S | RPS4X    | CCG2; SCAR; SCR10; DXS306                    |
| GI_4506738-S  | RPS6KB2  | p70S6Kb; P70-BETA                            |
| GI_4759053-S  | RRAD     | RAD; RAD1; REM3                              |
| GI_10863934-S | RTN1     | NSP                                          |
| GI_21264342-S | SAFB     | HAP; HET; SAFB1                              |
| GI_37574611-S | SBF1     | MTMR5                                        |
| GI_16445417-S | SCAMP2   |                                              |
| GI_33598936-A | SCARF2   | SREC2; SREC-II; SRECRP-1                     |
| GI_39930609-I | SCN1B    | GEFSP1                                       |
| GI_21703709-S | SCOTIN   |                                              |
| GI_33186909-A | SCRIB    | CRIB1; SCRIB1; SCRIB1; Vartul; KIAA0147      |
| GI_14150018-S | SCRT1    |                                              |
| GI_8922466-S  | SDAD1    |                                              |
| GI_5032082-S  | SDCBP    | ST1; SYCL; MDA-9; TACIP18; SYNTENIN          |
| GI_38016915-A | SDCBP2   | ST-2; SITAC18                                |
| GI_11545742-S | SDF2L1   |                                              |
| GI_38202213-S | SEC23A   | MGC26267                                     |
| GI_14591931-S | SEC61A1  | HSEC61                                       |
| GI_24308274-S | SELB     | EFSEC; EEFSEC                                |
| GI_17975596-S | SELM     |                                              |
| GI_39777609-I | SEMA4B   | SemC; SEMAC; KIAA1745                        |
| GI_24234731-A | SEMA6D   | FLJ11598; KIAA1479                           |
| GI_4506886-S  | SEPW1    | se1W                                         |
| GI_21361197-S | SERPINA1 | PI; A1A; AAT; PI1; A1AT; alpha-1-antitrypsin |
| GI_9665246-S  | SERPINA3 | ACT; AACT                                    |
| GI_21361301-S | SERPINA4 | KAL; KST; PI4; KLST; kallistatin             |
| GI_4505148-S  | SERPINB7 | MEGSIN                                       |
| GI_7019524-S  | SERTAD1  |                                              |
| GI_32189413-S | SF3A2    | PRP11; SAP62; SF3a66                         |
| GI_33469963-A | SF4      | RBP; F23858; DKFZp434E2216                   |
| GI_37563661-S | SFI1     |                                              |
| GI_8400734-S  | SFRP5    | SARP3                                        |
| GI_21389350-S | SFXN5    | BBG-TCC                                      |
| GI_31543619-S | SGSH     | HSS; SFMD; MPS3A                             |
| GI_21361603-S | SH3TC1   |                                              |
| GI_31542518-S | Sharpin  |                                              |
| GI_28373091-A | SIAT7D   | SIAT3C; ST6GALNAC4; ST6GALNACIV              |
| GI_11141876-S | SIGIRR   |                                              |
| GI_31543622-S | SIL1     | BAP                                          |
| GI_24497626-A | SIPA1    | SPA1; MGC17037                               |
| GI_13775601-A | SIRT2    | SIR2L; SIR2L2                                |
| GI_34147624-S | SIX2     |                                              |
| GI_19913344-S | SLBP     | HBP                                          |
| GI_5730042-S  | SLC12A7  | KCC4; DKFZP434F076                           |
| GI_20127461-S | SLC16A5  | MCT5                                         |
| GI_21389314-S | SLC25A1  | CTP; SLC20A3                                 |
| GI_10835018-S | SLC29A2  | ENT2; DER12; HNP36                           |
| GI_27777666-S | SLC30A8  | ZnT-8                                        |
| GI_22748628-S | SLC39A13 | FLJ25785                                     |

(continued)

Insulin Promoter Screen

Table S1. (continued)

|               |         |                                                                          |
|---------------|---------|--------------------------------------------------------------------------|
| GI_27734776-S | SLC39A5 |                                                                          |
| GI_23308570-S | SLC3A1  | D2H; ATR1; NBAT; RBAT; CSNU1                                             |
| GI_34147653-S | SLC3A2  | 4F2; CD98; MDU1; 4F2HC; NACAE                                            |
| GI_21361550-S | SLC4A2  | AE2; HKB3; BND3L; NBND3; EPB3L1                                          |
| GI_5032096-S  | SLC6A8  | CT1; CRTR                                                                |
| GI_34222350-S | SLC7A5  | E16; CD98; LAT1; MPE16; D16S469E                                         |
| GI_5454069-S  | SLC9A6  | NHE6; KIAA0267                                                           |
| GI_21071055-S | SMARCA4 | BRG1; BAF190; SNF2L4; SNF2LB; hSNF2B; SNF2-BETA                          |
| GI_27545325-S | SMARCB1 | RDT; INI1; SNF5; Snr1; BAF47; Sfh1p; hSNFS; SNF5L1                       |
| GI_21237807-A | SMARCC2 | Rsc8; BAF170; CRACC2                                                     |
| GI_21264350-S | SMARCD2 | BAF60B; CRACD2; PR02451                                                  |
| GI_34147321-S | SMPDL3A |                                                                          |
| GI_12232400-S | SMYD3   | ZMYND1; ZNFN3A1; FLJ21080                                                |
| GI_31543647-S | SNRP70  | RPU1; U1AP; U170K; U1RNP; RNPUIZ                                         |
| GI_4507150-S  | SOD3    |                                                                          |
| GI_41282001-I | SPHK1   | SPHK                                                                     |
| GI_4507178-S  | SPINK1  | PCTT; PSTI; TATI                                                         |
| GI_41281781-I | SPPL2B  | IMP4; PSL1; KIAA1532                                                     |
| GI_22507315-S | SPTB    |                                                                          |
| GI_32698749-S | SR-A1   |                                                                          |
| GI_27477112-S | SREBF2  | SREBP2                                                                   |
| GI_22507413-S | SRMS    | SRM; C200rf148; dj697K14.1                                               |
| GI_24497619-S | SRP68   |                                                                          |
| GI_21314683-A | SSBP3   | SSDP; SSDP1; SSDP3; FLJ10355                                             |
| GI_14249149-S | SSBP4   | MGC3181                                                                  |
| GI_4505324-S  | SSNA1   | N14; NA14                                                                |
| GI_5453837-S  | SSSCA1  | p27                                                                      |
| GI_4507242-S  | SST     | SMST                                                                     |
| GI_8923213-S  | STAP2   | BKS; STAP-2; FLJ20234                                                    |
| GI_23397677-S | STAT6   | STAT6B; STAT6C; D12S1644; IL-4-STAT                                      |
| GI_4507266-S  | STC2    | STC-2; STCRP                                                             |
| GI_5454093-S  | STK3    | KRS1; MST2                                                               |
| GI_7019572-S  | STRN4   | ZIN; zinedin                                                             |
| GI_4507284-S  | STX10   | SYN10; hsyn10                                                            |
| GI_4759181-S  | STX1A   | STX1; HPC-1; p35-1                                                       |
| GI_34147519-S | STX6    |                                                                          |
| GI_5902127-S  | STXBP2  | UNC18B; UNC18-2; MUNC18-2                                                |
| GI_6005885-S  | STXBP3  | PSP; MUNC18C; UNC-18C; MUNC18-3                                          |
| GI_19557701-S | SURF6   | FLJ30322                                                                 |
| GI_32401419-S | SYNPR   | SPO; MGC26651                                                            |
| GI_31342626-S | SYT12   | SRG1; SYT11                                                              |
| GI_38194226-S | SYT7    | SYT-VII                                                                  |
| GI_21536354-A | TAF6    | TAF2E; TAFII70; TAFII80; TAFII85; MGC:8964                               |
| GI_11993942-S | TAX1BP3 |                                                                          |
| GI_24308016-S | TBC1D1  | TBC; TBC1; KIAA1108                                                      |
| GI_8400735-S  | TBCD    | KIAA0988                                                                 |
| GI_34222210-S | TCBA1   | MGC41924                                                                 |
| GI_19924146-A | TCIRG1  | a3; Stv1; Vph1; Atp6i; OC116; OPTB1; TIRC7; ATP6N1C; ATP6V0A3; OC-116kDa |
| GI_20127439-S | TETTRAN | TETTRAN                                                                  |
| GI_34147580-S | TEX264  | SIG11                                                                    |
| GI_21359903-S | TFE3    | RCCP2                                                                    |
| GI_24307932-S | TFEB    | TCFEB                                                                    |
| GI_7019370-S  | TFPT    | FB1; amida                                                               |
| GI_33589847-S | TFR2    | HFE3                                                                     |
| GI_17572809-S | THOC4   | ALY; BEF                                                                 |
| GI_34222291-S | THOP1   |                                                                          |
| GI_7661929-S  | THRAP4  |                                                                          |
| GI_5032180-S  | TIMM17B | JM3; TIM17B; DXS9822                                                     |
| GI_4507508-S  | TIMP1   | EPA; EPO; HCI; CLGI; TIMP                                                |
| GI_33636700-S | TK2     |                                                                          |
| GI_21265109-S | TM4SF4  | ILTMP; il-TMP; FLJ31015                                                  |

(continued)

Table S1. (continued)

|               |           |                                                                                                     |
|---------------|-----------|-----------------------------------------------------------------------------------------------------|
| GI_4507546-S  | TM7SF2    | ANG1                                                                                                |
| GI_8922460-S  | TMEM38B   |                                                                                                     |
| GI_42657651-S | TMEM63B   |                                                                                                     |
| GI_13994299-S | TMPIT     |                                                                                                     |
| GI_4507554-S  | TMPO      | TP; LAP2                                                                                            |
| GI_7706185-S  | TNFRSF12A | FN14; TWEAKR                                                                                        |
| GI_23200040-S | TNFRSF14  | TR2; ATAR; HVEA; HVEM; LIGHTR                                                                       |
| GI_23238201-A | TNFRSF19  | TAJ; TROY; TRADE; TAJ-alpha                                                                         |
| GI_23312372-S | TNFRSF1A  | FPF; p55; p60; TBP1; TNF-R; TNFAR; TNFR1; p55-R; CD120a; TNFR55; TNFR60; TNF-R-I; TNF-R55; MGC19588 |
| GI_21361267-S | TNIP1     | VAN; NAF1; ABIN-1; KIAA0113                                                                         |
| GI_7657256-S  | TOMM20    |                                                                                                     |
| GI_4557540-S  | TOR1A     | DQ2; TOR1A                                                                                          |
| GI_18497297-S | TOR2A     | TORP1; FLJ14771                                                                                     |
| GI_4507652-S  | TPMT      |                                                                                                     |
| GI_14150010-S | TRAF7     | TRAF7; RNF119; DKFZp5861021                                                                         |
| GI_10864020-S | TRAPPC1   | BET5; MUM2                                                                                          |
| GI_31542264-S | TRIB3     | NIPK; SINK; TRB3; SKIP3; TRIB3                                                                      |
| GI_41281980-I | TRIF      | TICAM1; PRVTIRB; MGC35334                                                                           |
| GI_24497621-S | TRIM11    | BIA1; RNF92                                                                                         |
| GI_14971416-S | TRIM28    | KAP1; TF1B; RNF96; TIF1B                                                                            |
| GI_16445353-A | TRIM31    | RNF; HCG1; HCGI; C6orf13                                                                            |
| GI_11342675-S | TRIP10    | CIP4                                                                                                |
| GI_31542640-S | TRMT1     |                                                                                                     |
| GI_18158415-S | TRPC4AP   | TRUSS; TRRP4AP; C200rf188                                                                           |
| GI_34303921-S | TRUB1     |                                                                                                     |
| GI_21071005-S | TSSC4     |                                                                                                     |
| GI_34335291-S | TST       | RDS; MGC19578                                                                                       |
| GI_17921988-S | TUBA1     | FLJ30169; H2-ALPHA                                                                                  |
| GI_5729839-S  | TUBGCP2   | GCP2; Spc97p                                                                                        |
| GI_21361510-S | TXNDC11   |                                                                                                     |
| GI_18104958-S | TXNDC9    |                                                                                                     |
| GI_5454143-S  | UBD       | FAT10                                                                                               |
| GI_32967281-S | UBE2B     | HR6B; UBC2; HHR6B; RAD6B; E2-17kDa                                                                  |
| GI_33359690-A | UBE2E1    | UBCH6                                                                                               |
| GI_37577133-S | UBE2M     | UBC12; hUbc12; UBC-RS2                                                                              |
| GI_7657045-S  | UBE2S     |                                                                                                     |
| GI_34222339-S | UBTD1     |                                                                                                     |
| GI_7657670-S  | UBTF      | UBF; NOR-90                                                                                         |
| GI_13376853-S | UBXD1     | UBXDC2                                                                                              |
| GI_16596691-S | UCN3      | SCP; SPC; UCNIII                                                                                    |
| GI_4507818-S  | UGT2B15   | UGT2B8                                                                                              |
| GI_23199984-S | ULK2      | KIAA0623                                                                                            |
| GI_4507846-S  | USF2      | FIP                                                                                                 |
| GI_22550103-S | USP32     | USP10; NY-REN-60                                                                                    |
| GI_10863942-S | UTX       |                                                                                                     |
| GI_4507868-S  | VASP      |                                                                                                     |
| GI_18379348-S | VAT1      | VATI; FLJ20230                                                                                      |
| GI_7669552-S  | VCP       | p97; TERA                                                                                           |
| GI_4507894-S  | VIM       |                                                                                                     |
| GI_42544225-S | VPS18     | KIAA1475                                                                                            |
| GI_37674208-S | WDR18     | MGC2436; R32184_1                                                                                   |
| GI_31317275-A | WDR20     | DMR; FLJ33659; MGC33177; MGC33183                                                                   |
| GI_31657100-A | WDR23     | GL014; PR02389                                                                                      |
| GI_34147468-S | WDR34     |                                                                                                     |
| GI_11072092-I | WDR6      | FLJ10218                                                                                            |
| GI_22095348-S | WDTC1     |                                                                                                     |
| GI_13376995-S | WFS1      | WFS; WFRS; DFNA6; DFNA14; DFNA38; DIDMOAD; WOLFRAMIN                                                |
| GI_19913362-S | WHSC2     | NELFA; FLJ10442; FLJ25112; P/OKc1.15                                                                |
| GI_17402921-S | WNT4      | WNT-4                                                                                               |

(continued)

Table S1. (continued)

|               |         |                                                     |
|---------------|---------|-----------------------------------------------------|
| GI_8051634-S  | XP01    | CRM1                                                |
| GI_19923271-S | XPR1    | X3; SYG1                                            |
| GI_4507996-S  | ZBTB17  | MIZ1; pHZ-67                                        |
| GI_15812177-S | ZFP36L2 | BRF2; ERF2; ERF-2; TIS11D                           |
| GI_31563371-A | ZGPAT   | FLJ14972; MGC44880; dJ583P15.3                      |
| GI_6005965-S  | ZNF146  | OZF                                                 |
| GI_31543982-S | ZNF289  | IRZ; Zfp289; FLJ14576                               |
| GI_37622344-A | ZNF42   | MZF1; MZF-1; MZF1B                                  |
| GI_24432061-S | ZNF513  |                                                     |
| GI_23397478-S | ZNF524  |                                                     |
| GI_21687263-S | ZNF558  |                                                     |
| GI_27734902-S | ZNF584  |                                                     |
| GI_4508034-S  | ZNF7    | KOX4; HF.16                                         |
| GI_18599776-S | ZYG11B  |                                                     |
| GI_38202225-S | ZZEF1   |                                                     |
| GI_5032100-S  | ABCC5   | MRP5; SMRP; ABC33; MOATC; MOAT-C; pABC11; EST277145 |
| GI_11545766-S | ABHD4   | FLJ12816                                            |
| GI_21327681-S | ACADM   | MCAD; ACAD1; MCADH                                  |
| GI_4557232-S  | ACADS   | SCAD; ACAD3                                         |
| GI_7710156-A  | ACHE    | YT                                                  |
| GI_13325060-S | ACTR1B  | ARP1B; CTRN2                                        |

transgene, and the red channel to assess autofluorescence. DAPI fluorescence produced a nuclear mask that allowed the microscope to focus from well to well on the plate.

Image processing (Cytoshop, Beckman Coulter) was used to perform shade correction, nuclear segmentation, and cytometry. Due to lamp variations throughout the imaging process, shade correction and plate-to-plate normalization techniques were used by equilibrating plate and global medians. Cell-by-cell analysis was performed by tessellation and pixel intensity measurements. The segmentation protocol involved the following steps:

1. The nucleus of each cell was identified using Cytoshop's nuclear segmentation algorithm that included an "open" morphological operation.
2. Equidistance tessellation lines were drawn between the centroids of the identified nuclei, effectively breaking up the images into cellular regions.
3. An Object Extraction Correlation radius of 30 pixels was set, inside which pixels were assumed to belong to the cytoplasm of the cell.

Hits were then determined by applying threshold intensity gates on the green channel and surveying the number of cells above or below that gate in a given well by analyzing the average green pixel intensity under the cytoplasmic mask. These counts were then normalized to the total number of cells per well to give a percent GFP-positive cells quotient. To construct the final assay-wide database from the individual plate

databases, we used a MATLAB algorithm to collate the individual plate data.

#### *Chronic ethopropazine treatment*

T6PNE cells were seeded in a 10-cm dish with 0.5  $\mu$ M tamoxifen. At 24 h, either 15  $\mu$ M ethopropazine or a vehicle control was added. At 96 h, the cells were passed into either a 384-well clear-bottom black well plate for imaging or a 10-cm dish for continued culture along with fresh ethopropazine or vehicle. The same passing procedure was performed every 3 days for the remainder of the 12-day experiment. The 384-well plates seeded for imaging were fixed in 4% formaldehyde 24 h after they were seeded. DAPI was then added at a final concentration of 167  $\mu$ g/mL. The plates were imaged on the IC 100 in the blue and green channels, and Cytoshop analysis was then performed to determine the percentage of cells in each well that contained GFP above a threshold determined by a MATLAB algorithm (% GFP+). Fold change in % GFP+ cells per well treated with ethopropazine (15  $\mu$ M) versus vehicle control was measured over 12 days ( $n = 3$ ; error bars are standard error;  $p < 0.05$ ).

#### *Phenothiazine structure-activity relationship*

T6PNE cells were seeded at 1750 cells per well in clear-bottom black 384-well plates with 0.5  $\mu$ M tamoxifen. At 24 h, the phenothiazine or vehicle was added at a concentration range of 1.25 to 20  $\mu$ M. Cells were fixed with 4% formaldehyde at 72 h. DAPI was then added at a final concentration of 0.167  $\mu$ g/mL. The

plates were imaged on the IC 100 in the blue and green channels, and Cytoshop analysis was then performed to determine the percentage of cells in each well that contained GFP above a threshold determined by a MATLAB algorithm (% GFP+).

#### REFERENCES

1. Itkin-Ansari P, Marcora E, Geron I, Tyrberg B, Demeterco C, Hao E, et al: NeuroD1 in the endocrine pancreas: localization and dual function as an activator and repressor. *Dev Dyn* 2005;233:946-953.
2. Halvorsen TL, Beattie GM, Lopez AD, Hayek A, Levine F: Accelerated telomere shortening and senescence in human pancreatic islet cells stimulated to divide in vitro. *J Endocrinol* 2000;166:103-109.
3. Engel I, Murre C: Ectopic expression of E47 or E12 promotes the death of E2A-deficient lymphomas. *Proc Natl Acad Sci USA* 1999;96:996-1001.
4. Alheim K, Corness J, Samuelsson MK, Bladh LG, Murata T, Nilsson T, et al: Identification of a functional glucocorticoid response element in the promoter of the cyclin-dependent kinase inhibitor p57Kip2. *J Mol Endocrinol* 2003;30:359-368.
5. Weintraub H, Davis R, Lockshon D, Lassar A: MyoD binds cooperatively to two sites in a target enhancer sequence: occupancy of two sites is required for activation. *Proc Natl Acad Sci USA* 1990;87:5623-5627.
6. Carlesso N, Aster JC, Sklar J, Scadden DT: Notch1-induced delay of human hematopoietic progenitor cell differentiation is associated with altered cell cycle kinetics. *Blood* 1999;93:838-848.
7. Hao E, Tyrberg B, Itkin-Ansari P, Lakey JR, Geron I, Monosov EZ, et al: Beta-cell differentiation from nonendocrine epithelial cells of the adult human pancreas. *Nat Med* 2006;12:310-316.
8. Singer O, Marr RA, Rockenstein E, Crews L, Coufal NG, Gage FH, et al: Targeting BACE1 with siRNAs ameliorates Alzheimer disease neuropathology in a transgenic model. *Nat Neurosci* 2005;8:1343-1349.
9. Tiscornia G, Singer O, Ikawa M, Verma IM: A general method for gene knockdown in mice by using lentiviral vectors expressing small interfering RNA. *Proc Natl Acad Sci USA* 2003;100:1844-1848.
10. Ball AJ, Abrahamsson AE, Tyrberg B, Itkin-Ansari P, Levine F: HES6 reverses nuclear reprogramming of insulin-producing cells following cell fusion. *Biochem Biophys Res Commun* 2007;355:331-337.
